# Supplementary material
Source: MDPI journal article supplement (https://www.mdpi.com/2073-4352/2/4/1441)
Supplement: s3 [file s3]

 
data_shelxl
 
_audit_creation_method            SHELXL-97
_chemical_name_systematic
;
 pyranocoumarin
;
_chemical_name_common             
;
Aegelinol
;
_chemical_melting_point           'not measured'
_chemical_formula_moiety          'C14 H14 O4'
_chemical_formula_sum
 'C14 H14 O4'
_chemical_formula_weight          246.25
_chemical_absolute_configuration  'unk'
 
loop_
 _atom_type_symbol
 _atom_type_description
 _atom_type_scat_dispersion_real
 _atom_type_scat_dispersion_imag
 _atom_type_scat_source
 'C'  'C'   0.0033   0.0016
 'International Tables Vol C Tables 4.2.6.8 and 6.1.1.4'
 'H'  'H'   0.0000   0.0000
 'International Tables Vol C Tables 4.2.6.8 and 6.1.1.4'
 'O'  'O'   0.0106   0.0060
 'International Tables Vol C Tables 4.2.6.8 and 6.1.1.4'
 
_symmetry_cell_setting            orthorhombic
_symmetry_space_group_name_H-M    'P 21 21 21'
_symmetry_space_group_name_Hall   'P 2ac 2ab'
 
loop_
 _symmetry_equiv_pos_as_xyz
 'x, y, z'
 '-x+1/2, -y, z+1/2'
 '-x, y+1/2, -z+1/2'
 'x+1/2, -y+1/2, -z'
 
_cell_length_a                    6.8921(3)
_cell_length_b                    11.4302(9)
_cell_length_c                    44.964(3)
_cell_angle_alpha                 90.00
_cell_angle_beta                  90.00
_cell_angle_gamma                 90.00
_cell_volume                      3542.2(4)
_cell_formula_units_Z             12
_cell_measurement_temperature     150.05(10)
_cell_measurement_reflns_used     2837
_cell_measurement_theta_min       3.2468
_cell_measurement_theta_max       28.0954
 
_exptl_crystal_description        'rod like'
_exptl_crystal_colour             'colorless'
_exptl_crystal_size_max           0.4
_exptl_crystal_size_mid           0.2
_exptl_crystal_size_min           0.2
_exptl_crystal_density_meas       'not measured'
_exptl_crystal_density_diffrn     1.385
_exptl_crystal_density_method     'not measured'
_exptl_crystal_F_000              1560
_exptl_absorpt_coefficient_mu     0.102
_exptl_absorpt_correction_type    multi-scan
_exptl_absorpt_correction_T_min   0.93651
_exptl_absorpt_correction_T_max   1.00000
_exptl_absorpt_process_details
;
'Sat Apr 21 20:58:11 2012'
;
 
_exptl_special_details
;
 ?
;
 
_diffrn_ambient_temperature       150.05(10)
_diffrn_radiation_wavelength      0.71073
_diffrn_radiation_type            MoK\a
_diffrn_radiation_source          'fine-focus sealed tube'
_diffrn_radiation_monochromator   graphite
_diffrn_measurement_device_type   'Xcalibur, Ruby, Gemini ultra'
_diffrn_measurement_method        '\w scans'
_diffrn_detector_area_resol_mean  10.3712
_diffrn_reflns_number             11272
_diffrn_reflns_av_R_equivalents   0.0296
_diffrn_reflns_av_sigmaI/netI     0.0830
_diffrn_reflns_limit_h_min        -8
_diffrn_reflns_limit_h_max        6
_diffrn_reflns_limit_k_min        -11
_diffrn_reflns_limit_k_max        15
_diffrn_reflns_limit_l_min        -48
_diffrn_reflns_limit_l_max        59
_diffrn_reflns_theta_min          3.2468
_diffrn_reflns_theta_max          28.0954
_reflns_number_total              5883
_reflns_number_gt                 5198
_reflns_threshold_expression      >2sigma(I)
 
_computing_data_collection
;
'Sat Apr 21 20:58:11 2012'
;
_computing_cell_refinement
;
'Sat Apr 21 20:58:11 2012'
;
_computing_data_reduction
;
'Sat Apr 21 20:58:11 2012'
;
_computing_structure_solution     'SHELXS-86 (Sheldrick, 1986)'
_computing_structure_refinement   'SHELXL-97 (Sheldrick, 1997)'
_computing_molecular_graphics     'Ortep-3 for Windows (Farrugia, 1997)'
_computing_publication_material   'WinGX publication routines (Farrugia, 1999)'
 
_refine_special_details
;
 Refinement of F^2^ against ALL reflections.  The weighted R-factor wR and
 goodness of fit S are based on F^2^, conventional R-factors R are based
 on F, with F set to zero for negative F^2^. The threshold expression of
 F^2^ > 2sigma(F^2^) is used only for calculating R-factors(gt) etc. and is
 not relevant to the choice of reflections for refinement.  R-factors based
 on F^2^ are statistically about twice as large as those based on F, and R-
 factors based on ALL data will be even larger.
;
 
_refine_ls_structure_factor_coef  Fsqd
_refine_ls_matrix_type            full
_refine_ls_weighting_scheme       calc
_refine_ls_weighting_details
 'calc w=1/[\s^2^(Fo^2^)+(0.0355P)^2^+0.7867P] where P=(Fo^2^+2Fc^2^)/3'
_atom_sites_solution_primary      direct
_atom_sites_solution_secondary    difmap
_atom_sites_solution_hydrogens    geom
_refine_ls_hydrogen_treatment     
;
all Hydrogen atoms have been refined in
 the riding mode on their carrier atom
;
_refine_ls_extinction_method      SHELXL
_refine_ls_extinction_coef        0.0010(3)
_refine_ls_extinction_expression
 'Fc^*^=kFc[1+0.001xFc^2^\l^3^/sin(2\q)]^-1/4^'
_refine_ls_abs_structure_details
 'Flack H D (1983), Acta Cryst. A39, 876-881'
_refine_ls_abs_structure_Flack    0.4(9)
_refine_ls_number_reflns          5883
_refine_ls_number_parameters      491
_refine_ls_number_restraints      0
_refine_ls_R_factor_all           0.0522
_refine_ls_R_factor_gt            0.0444
_refine_ls_wR_factor_ref          0.1005
_refine_ls_wR_factor_gt           0.0956
_refine_ls_goodness_of_fit_ref    1.097
_refine_ls_restrained_S_all       1.097
_refine_ls_shift/su_max           0.001
_refine_ls_shift/su_mean          0.000
 
loop_
 _atom_site_label
 _atom_site_type_symbol
 _atom_site_fract_x
 _atom_site_fract_y
 _atom_site_fract_z
 _atom_site_U_iso_or_equiv
 _atom_site_adp_type
 _atom_site_occupancy
 _atom_site_symmetry_multiplicity
 _atom_site_calc_flag
 _atom_site_refinement_flags
 _atom_site_disorder_assembly
 _atom_site_disorder_group
C1A C 0.6382(3) 0.6445(2) 0.95951(6) 0.0255(6) Uani 1 1 d . . .
C2A C 0.6382(3) 0.5781(2) 0.98665(6) 0.0273(6) Uani 1 1 d . . .
H37 H 0.6405 0.4968 0.9857 0.033 Uiso 1 1 calc R . .
C3A C 0.6347(3) 0.6306(2) 1.01336(6) 0.0260(6) Uani 1 1 d . . .
H36 H 0.6343 0.5856 1.0306 0.031 Uiso 1 1 calc R . .
C4A C 0.6318(3) 0.7556(2) 1.01538(5) 0.0219(5) Uani 1 1 d . . .
C5A C 0.6319(3) 0.8176(2) 1.04218(5) 0.0222(5) Uani 1 1 d . . .
H34 H 0.6342 0.7762 1.0600 0.027 Uiso 1 1 calc R . .
C6A C 0.6286(3) 0.9389(2) 1.04308(5) 0.0232(5) Uani 1 1 d . . .
C7A C 0.6222(4) 1.0054(2) 1.07188(5) 0.0279(6) Uani 1 1 d . . .
H32A H 0.7522 1.0118 1.0800 0.033 Uiso 1 1 calc R . .
H32B H 0.5427 0.9635 1.0861 0.033 Uiso 1 1 calc R . .
C8A C 0.5390(3) 1.1268(2) 1.06694(5) 0.0266(6) Uani 1 1 d . . .
H31 H 0.5581 1.1732 1.0850 0.032 Uiso 1 1 calc R . .
C9A C 0.6423(4) 1.1870(2) 1.04123(6) 0.0285(6) Uani 1 1 d . . .
C10A C 0.6264(3) 0.9994(2) 1.01587(5) 0.0214(5) Uani 1 1 d . . .
C11A C 0.6252(3) 0.9401(2) 0.98900(5) 0.0224(5) Uani 1 1 d . . .
H310 H 0.6220 0.9811 0.9711 0.027 Uiso 1 1 calc R . .
C12A C 0.6288(3) 0.8200(2) 0.98908(5) 0.0204(5) Uani 1 1 d . . .
C13A C 0.8590(4) 1.1997(3) 1.04732(6) 0.0386(7) Uani 1 1 d . . .
H31D H 0.9206 1.2360 1.0305 0.058 Uiso 1 1 calc R . .
H31E H 0.9148 1.1238 1.0506 0.058 Uiso 1 1 calc R . .
H31F H 0.8780 1.2472 1.0647 0.058 Uiso 1 1 calc R . .
C14A C 0.5542(5) 1.3049(2) 1.03404(6) 0.0424(7) Uani 1 1 d . . .
H31A H 0.6204 1.3385 1.0173 0.064 Uiso 1 1 calc R . .
H31B H 0.5669 1.3557 1.0509 0.064 Uiso 1 1 calc R . .
H31C H 0.4193 1.2952 1.0293 0.064 Uiso 1 1 calc R . .
O1A O 0.6485(2) 0.60447(15) 0.93435(4) 0.0320(4) Uani 1 1 d . . .
O2A O 0.6279(2) 0.76421(14) 0.96176(4) 0.0242(4) Uani 1 1 d . . .
O3A O 0.6173(3) 1.11835(14) 1.01404(4) 0.0301(4) Uani 1 1 d . . .
O4A O 0.3359(2) 1.12201(16) 1.06041(4) 0.0355(5) Uani 1 1 d . . .
H34A H 0.2932 1.0576 1.0650 0.053 Uiso 1 1 calc R . .
C1B C 0.7640(3) 0.4119(2) 0.80264(6) 0.0293(6) Uani 1 1 d . . .
C2B C 0.7199(4) 0.4696(2) 0.83019(6) 0.0335(7) Uani 1 1 d . . .
H17 H 0.6991 0.5499 0.8303 0.040 Uiso 1 1 calc R . .
C3B C 0.7081(3) 0.4097(2) 0.85589(6) 0.0315(6) Uani 1 1 d . . .
H16 H 0.6786 0.4490 0.8734 0.038 Uiso 1 1 calc R . .
C4B C 0.7404(3) 0.2861(2) 0.85651(5) 0.0254(6) Uani 1 1 d . . .
C5B C 0.7245(3) 0.2156(2) 0.88185(5) 0.0286(6) Uani 1 1 d . . .
H14 H 0.6897 0.2503 0.8998 0.034 Uiso 1 1 calc R . .
C6B C 0.7586(3) 0.0962(2) 0.88120(5) 0.0267(6) Uani 1 1 d . . .
C7B C 0.7384(4) 0.0211(2) 0.90841(6) 0.0366(7) Uani 1 1 d . . .
H12A H 0.6023 0.0039 0.9117 0.044 Uiso 1 1 calc R . .
H12B H 0.7862 0.0636 0.9256 0.044 Uiso 1 1 calc R . .
C8B C 0.8504(4) -0.0930(2) 0.90529(6) 0.0331(6) Uani 1 1 d . . .
H11 H 0.8019 -0.1465 0.9206 0.040 Uiso 1 1 calc R . .
C9B C 0.8100(4) -0.1499(2) 0.87520(6) 0.0332(6) Uani 1 1 d . . .
C10B C 0.8143(3) 0.0459(2) 0.85401(5) 0.0254(6) Uani 1 1 d . . .
C11B C 0.8298(3) 0.1132(2) 0.82841(5) 0.0251(6) Uani 1 1 d . . .
H110 H 0.8655 0.0791 0.8105 0.030 Uiso 1 1 calc R . .
C12B C 0.7914(3) 0.2314(2) 0.83000(5) 0.0227(6) Uani 1 1 d . . .
C13B C 0.5961(4) -0.1811(3) 0.87190(7) 0.0495(8) Uani 1 1 d . . .
H11D H 0.5745 -0.2157 0.8527 0.074 Uiso 1 1 calc R . .
H11E H 0.5190 -0.1115 0.8738 0.074 Uiso 1 1 calc R . .
H11F H 0.5599 -0.2357 0.8871 0.074 Uiso 1 1 calc R . .
C14B C 0.9359(5) -0.2562(3) 0.86992(7) 0.0475(8) Uani 1 1 d . . .
H11A H 0.9026 -0.2910 0.8512 0.071 Uiso 1 1 calc R . .
H11B H 0.9152 -0.3120 0.8856 0.071 Uiso 1 1 calc R . .
H11C H 1.0698 -0.2332 0.8697 0.071 Uiso 1 1 calc R . .
O1B O 0.7684(3) 0.45710(16) 0.77812(4) 0.0376(5) Uani 1 1 d . . .
O2B O 0.8045(2) 0.29438(14) 0.80377(4) 0.0260(4) Uani 1 1 d . . .
O3B O 0.8634(3) -0.06893(15) 0.85117(4) 0.0346(4) Uani 1 1 d . . .
O4B O 1.0522(3) -0.07729(17) 0.91055(4) 0.0395(5) Uani 1 1 d . . .
H14A H 1.0917 -0.0216 0.9008 0.059 Uiso 1 1 calc R . .
C1C C 0.2602(3) 0.1688(2) 0.86577(6) 0.0248(6) Uani 1 1 d . . .
C2C C 0.3059(3) 0.1058(2) 0.83899(6) 0.0281(6) Uani 1 1 d . . .
H27 H 0.3260 0.0254 0.8399 0.034 Uiso 1 1 calc R . .
C3C C 0.3200(3) 0.1610(2) 0.81274(6) 0.0264(6) Uani 1 1 d . . .
H26 H 0.3493 0.1183 0.7957 0.032 Uiso 1 1 calc R . .
C4C C 0.2908(3) 0.2841(2) 0.81063(5) 0.0220(5) Uani 1 1 d . . .
C5C C 0.3027(3) 0.3482(2) 0.78422(5) 0.0242(6) Uani 1 1 d . . .
H24 H 0.3273 0.3089 0.7665 0.029 Uiso 1 1 calc R . .
C6C C 0.2791(3) 0.4687(2) 0.78360(5) 0.0241(6) Uani 1 1 d . . .
C7C C 0.2945(4) 0.5369(2) 0.75516(6) 0.0332(6) Uani 1 1 d . . .
H22A H 0.1702 0.5366 0.7450 0.040 Uiso 1 1 calc R . .
H22B H 0.3893 0.5003 0.7422 0.040 Uiso 1 1 calc R . .
C8C C 0.3551(3) 0.6622(2) 0.76164(6) 0.0330(6) Uani 1 1 d . . .
H21 H 0.3396 0.7080 0.7434 0.040 Uiso 1 1 calc R . .
C9C C 0.2261(4) 0.7156(2) 0.78550(6) 0.0315(6) Uani 1 1 d . . .
C10C C 0.2438(3) 0.5269(2) 0.81046(5) 0.0234(5) Uani 1 1 d . . .
C11C C 0.2269(3) 0.4651(2) 0.83691(5) 0.0219(5) Uani 1 1 d . . .
H210 H 0.1997 0.5041 0.8546 0.026 Uiso 1 1 calc R . .
C12C C 0.2509(3) 0.3456(2) 0.83674(5) 0.0209(5) Uani 1 1 d . . .
C13C C 0.0166(4) 0.7229(2) 0.77539(7) 0.0396(7) Uani 1 1 d . . .
H21D H -0.0605 0.7578 0.7908 0.059 Uiso 1 1 calc R . .
H21E H -0.0311 0.6457 0.7712 0.059 Uiso 1 1 calc R . .
H21F H 0.0086 0.7699 0.7577 0.059 Uiso 1 1 calc R . .
C14C C 0.2962(5) 0.8352(2) 0.79490(7) 0.0468(8) Uani 1 1 d . . .
H21A H 0.2127 0.8653 0.8102 0.070 Uiso 1 1 calc R . .
H21B H 0.2940 0.8870 0.7781 0.070 Uiso 1 1 calc R . .
H21C H 0.4262 0.8294 0.8024 0.070 Uiso 1 1 calc R . .
O1C O 0.2394(3) 0.12681(15) 0.89034(4) 0.0325(4) Uani 1 1 d . . .
O2C O 0.2375(2) 0.28819(14) 0.86368(4) 0.0243(4) Uani 1 1 d . . .
O3C O 0.2341(3) 0.64515(15) 0.81275(4) 0.0319(4) Uani 1 1 d . . .
O4C O 0.5539(3) 0.66833(17) 0.77057(6) 0.0502(6) Uani 1 1 d . . .
H24A H 0.5969 0.6020 0.7727 0.075 Uiso 1 1 calc R . .
 
loop_
 _atom_site_aniso_label
 _atom_site_aniso_U_11
 _atom_site_aniso_U_22
 _atom_site_aniso_U_33
 _atom_site_aniso_U_23
 _atom_site_aniso_U_13
 _atom_site_aniso_U_12
C1A 0.0238(12) 0.0206(13) 0.0320(14) -0.0041(12) 0.0020(12) 0.0005(11)
C2A 0.0295(12) 0.0174(12) 0.0349(15) -0.0006(12) 0.0026(12) -0.0015(12)
C3A 0.0256(12) 0.0215(13) 0.0310(14) 0.0043(12) 0.0042(11) 0.0013(12)
C4A 0.0200(11) 0.0199(12) 0.0258(13) 0.0051(12) 0.0032(11) 0.0011(10)
C5A 0.0240(11) 0.0239(13) 0.0187(12) 0.0043(11) 0.0006(11) 0.0015(11)
C6A 0.0207(11) 0.0275(14) 0.0215(12) 0.0004(12) 0.0001(10) 0.0018(11)
C7A 0.0312(13) 0.0305(14) 0.0220(13) -0.0008(12) 0.0006(11) -0.0011(12)
C8A 0.0257(11) 0.0289(14) 0.0252(13) -0.0053(12) -0.0028(11) -0.0011(12)
C9A 0.0387(14) 0.0230(13) 0.0237(13) -0.0060(12) -0.0002(12) -0.0034(12)
C10A 0.0236(11) 0.0191(12) 0.0216(13) 0.0003(11) 0.0003(11) -0.0005(11)
C11A 0.0292(12) 0.0226(13) 0.0153(11) 0.0047(11) -0.0004(10) 0.0010(11)
C12A 0.0198(11) 0.0236(13) 0.0179(11) -0.0028(11) 0.0035(10) -0.0006(10)
C13A 0.0401(15) 0.0417(17) 0.0341(15) -0.0066(14) 0.0064(13) -0.0096(14)
C14A 0.0666(19) 0.0255(15) 0.0351(16) -0.0041(14) -0.0027(15) 0.0029(15)
O1A 0.0380(10) 0.0280(10) 0.0301(10) -0.0075(9) 0.0024(8) 0.0028(9)
O2A 0.0295(8) 0.0216(9) 0.0216(9) -0.0017(8) 0.0019(7) 0.0007(8)
O3A 0.0484(10) 0.0196(9) 0.0224(9) -0.0023(8) -0.0017(8) -0.0003(9)
O4A 0.0299(9) 0.0297(10) 0.0469(11) -0.0091(10) -0.0022(9) -0.0016(9)
C1B 0.0168(11) 0.0288(15) 0.0422(16) 0.0045(14) -0.0057(12) -0.0031(12)
C2B 0.0276(13) 0.0236(15) 0.0492(17) -0.0006(14) -0.0061(13) -0.0012(12)
C3B 0.0230(12) 0.0324(15) 0.0391(16) -0.0090(13) -0.0019(12) -0.0018(12)
C4B 0.0155(10) 0.0308(15) 0.0300(14) -0.0036(12) -0.0026(11) 0.0004(11)
C5B 0.0220(11) 0.0415(17) 0.0223(13) -0.0056(12) 0.0005(11) -0.0017(13)
C6B 0.0228(11) 0.0360(16) 0.0213(13) 0.0019(12) -0.0001(11) -0.0009(12)
C7B 0.0383(14) 0.0486(18) 0.0230(13) 0.0041(13) 0.0012(13) -0.0069(15)
C8B 0.0311(13) 0.0389(16) 0.0292(14) 0.0136(13) -0.0020(12) -0.0088(13)
C9B 0.0399(14) 0.0327(15) 0.0271(14) 0.0129(13) -0.0040(12) -0.0049(13)
C10B 0.0237(11) 0.0280(15) 0.0245(13) 0.0042(12) -0.0027(10) -0.0002(12)
C11B 0.0256(12) 0.0313(14) 0.0185(12) -0.0018(11) -0.0014(10) 0.0022(12)
C12B 0.0181(11) 0.0273(14) 0.0228(13) 0.0037(12) -0.0050(10) 0.0002(11)
C13B 0.0509(17) 0.053(2) 0.0446(18) 0.0083(17) -0.0153(15) -0.0102(16)
C14B 0.063(2) 0.0356(17) 0.0436(18) 0.0114(16) -0.0077(16) 0.0028(16)
O1B 0.0332(10) 0.0359(11) 0.0436(11) 0.0143(10) -0.0066(9) -0.0021(9)
O2B 0.0268(8) 0.0248(9) 0.0264(9) 0.0048(8) -0.0045(7) -0.0001(8)
O3B 0.0499(11) 0.0273(10) 0.0266(9) 0.0072(9) 0.0012(9) 0.0054(10)
O4B 0.0365(10) 0.0424(12) 0.0395(11) 0.0189(10) -0.0087(9) -0.0106(9)
C1C 0.0190(11) 0.0225(13) 0.0328(14) 0.0061(12) -0.0032(11) -0.0064(11)
C2C 0.0281(12) 0.0190(13) 0.0373(15) -0.0017(12) -0.0020(12) 0.0000(11)
C3C 0.0213(11) 0.0270(14) 0.0309(14) -0.0073(12) 0.0014(11) -0.0006(11)
C4C 0.0168(11) 0.0249(13) 0.0244(13) -0.0024(11) -0.0007(10) -0.0024(11)
C5C 0.0208(11) 0.0323(14) 0.0196(12) -0.0047(12) 0.0017(10) -0.0027(11)
C6C 0.0186(11) 0.0325(15) 0.0211(12) 0.0052(12) -0.0011(10) -0.0007(11)
C7C 0.0335(14) 0.0412(17) 0.0250(13) 0.0095(13) 0.0014(12) 0.0033(13)
C8C 0.0248(12) 0.0389(16) 0.0352(15) 0.0169(13) -0.0039(12) -0.0015(13)
C9C 0.0311(13) 0.0296(15) 0.0337(14) 0.0126(13) -0.0067(12) -0.0004(13)
C10C 0.0199(11) 0.0221(14) 0.0281(13) 0.0003(11) -0.0012(11) -0.0002(11)
C11C 0.0238(11) 0.0242(14) 0.0178(12) -0.0017(11) 0.0017(10) 0.0005(11)
C12C 0.0156(10) 0.0268(14) 0.0203(12) 0.0041(11) 0.0006(10) -0.0020(11)
C13C 0.0300(13) 0.0355(17) 0.0534(18) 0.0083(15) -0.0011(13) 0.0023(13)
C14C 0.0565(19) 0.0299(16) 0.0539(19) 0.0142(15) -0.0131(16) -0.0089(15)
O1C 0.0363(10) 0.0292(10) 0.0321(10) 0.0095(9) -0.0017(9) -0.0066(9)
O2C 0.0269(8) 0.0230(9) 0.0231(8) 0.0022(8) 0.0012(7) -0.0008(8)
O3C 0.0455(10) 0.0221(9) 0.0279(10) 0.0064(8) -0.0026(9) 0.0009(9)
O4C 0.0250(9) 0.0434(12) 0.0822(16) 0.0306(13) -0.0017(10) -0.0009(9)
 
_geom_special_details
;
 All esds (except the esd in the dihedral angle between two l.s. planes)
 are estimated using the full covariance matrix.  The cell esds are taken
 into account individually in the estimation of esds in distances, angles
 and torsion angles; correlations between esds in cell parameters are only
 used when they are defined by crystal symmetry.  An approximate (isotropic)
 treatment of cell esds is used for estimating esds involving l.s. planes.
;
 
loop_
 _geom_bond_atom_site_label_1
 _geom_bond_atom_site_label_2
 _geom_bond_distance
 _geom_bond_site_symmetry_2
 _geom_bond_publ_flag
C1A O1A 1.222(3) . ?
C1A O2A 1.374(3) . ?
C1A C2A 1.437(3) . ?
C2A C3A 1.343(3) . ?
C3A C4A 1.432(3) . ?
C4A C12A 1.393(3) . ?
C4A C5A 1.398(3) . ?
C5A C6A 1.387(3) . ?
C6A C10A 1.406(3) . ?
C6A C7A 1.503(3) . ?
C7A C8A 1.518(4) . ?
C8A O4A 1.431(3) . ?
C8A C9A 1.522(4) . ?
C9A O3A 1.463(3) . ?
C9A C14A 1.513(4) . ?
C9A C13A 1.526(4) . ?
C10A O3A 1.363(3) . ?
C10A C11A 1.385(3) . ?
C11A C12A 1.373(3) . ?
C12A O2A 1.384(3) . ?
C1B O1B 1.218(3) . ?
C1B O2B 1.373(3) . ?
C1B C2B 1.436(4) . ?
C2B C3B 1.346(4) . ?
C3B C4B 1.430(4) . ?
C4B C12B 1.391(3) . ?
C4B C5B 1.400(3) . ?
C5B C6B 1.385(4) . ?
C6B C10B 1.405(3) . ?
C6B C7B 1.501(3) . ?
C7B C8B 1.523(4) . ?
C8B O4B 1.422(3) . ?
C8B C9B 1.527(4) . ?
C9B O3B 1.470(3) . ?
C9B C14B 1.512(4) . ?
C9B C13B 1.524(4) . ?
C10B O3B 1.361(3) . ?
C10B C11B 1.389(3) . ?
C11B C12B 1.379(3) . ?
C12B O2B 1.385(3) . ?
C1C O1C 1.213(3) . ?
C1C O2C 1.377(3) . ?
C1C C2C 1.438(3) . ?
C2C C3C 1.342(3) . ?
C3C C4C 1.424(3) . ?
C4C C12C 1.396(3) . ?
C4C C5C 1.398(3) . ?
C5C C6C 1.387(3) . ?
C6C C10C 1.400(3) . ?
C6C C7C 1.501(3) . ?
C7C C8C 1.520(4) . ?
C8C O4C 1.429(3) . ?
C8C C9C 1.521(4) . ?
C9C O3C 1.467(3) . ?
C9C C14C 1.511(4) . ?
C9C C13C 1.516(4) . ?
C10C O3C 1.357(3) . ?
C10C C11C 1.388(3) . ?
C11C C12C 1.376(3) . ?
C12C O2C 1.380(3) . ?
 
loop_
 _geom_angle_atom_site_label_1
 _geom_angle_atom_site_label_2
 _geom_angle_atom_site_label_3
 _geom_angle
 _geom_angle_site_symmetry_1
 _geom_angle_site_symmetry_3
 _geom_angle_publ_flag
O1A C1A O2A 116.4(2) . . ?
O1A C1A C2A 126.0(2) . . ?
O2A C1A C2A 117.6(2) . . ?
C3A C2A C1A 121.6(2) . . ?
C2A C3A C4A 120.2(2) . . ?
C12A C4A C5A 117.6(2) . . ?
C12A C4A C3A 118.3(2) . . ?
C5A C4A C3A 124.1(2) . . ?
C6A C5A C4A 122.1(2) . . ?
C5A C6A C10A 117.8(2) . . ?
C5A C6A C7A 122.1(2) . . ?
C10A C6A C7A 120.0(2) . . ?
C6A C7A C8A 110.4(2) . . ?
O4A C8A C7A 111.4(2) . . ?
O4A C8A C9A 108.6(2) . . ?
C7A C8A C9A 110.3(2) . . ?
O3A C9A C14A 104.6(2) . . ?
O3A C9A C8A 109.73(19) . . ?
C14A C9A C8A 112.2(2) . . ?
O3A C9A C13A 108.4(2) . . ?
C14A C9A C13A 110.3(2) . . ?
C8A C9A C13A 111.4(2) . . ?
O3A C10A C11A 115.8(2) . . ?
O3A C10A C6A 122.9(2) . . ?
C11A C10A C6A 121.2(2) . . ?
C12A C11A C10A 119.1(2) . . ?
C11A C12A O2A 117.3(2) . . ?
C11A C12A C4A 122.0(2) . . ?
O2A C12A C4A 120.7(2) . . ?
C1A O2A C12A 121.6(2) . . ?
C10A O3A C9A 118.61(19) . . ?
O1B C1B O2B 116.3(2) . . ?
O1B C1B C2B 126.3(2) . . ?
O2B C1B C2B 117.4(2) . . ?
C3B C2B C1B 121.4(2) . . ?
C2B C3B C4B 120.6(3) . . ?
C12B C4B C5B 117.3(2) . . ?
C12B C4B C3B 117.8(2) . . ?
C5B C4B C3B 124.9(2) . . ?
C6B C5B C4B 122.5(2) . . ?
C5B C6B C10B 117.9(2) . . ?
C5B C6B C7B 122.1(2) . . ?
C10B C6B C7B 120.0(2) . . ?
C6B C7B C8B 111.6(2) . . ?
O4B C8B C7B 111.8(2) . . ?
O4B C8B C9B 112.3(2) . . ?
C7B C8B C9B 110.7(2) . . ?
O3B C9B C14B 104.3(2) . . ?
O3B C9B C13B 108.5(2) . . ?
C14B C9B C13B 110.6(3) . . ?
O3B C9B C8B 109.7(2) . . ?
C14B C9B C8B 112.1(2) . . ?
C13B C9B C8B 111.2(2) . . ?
O3B C10B C11B 115.9(2) . . ?
O3B C10B C6B 123.0(2) . . ?
C11B C10B C6B 121.0(2) . . ?
C12B C11B C10B 119.0(2) . . ?
C11B C12B O2B 116.9(2) . . ?
C11B C12B C4B 122.2(2) . . ?
O2B C12B C4B 120.8(2) . . ?
C1B O2B C12B 121.8(2) . . ?
C10B O3B C9B 118.43(19) . . ?
O1C C1C O2C 116.2(2) . . ?
O1C C1C C2C 126.2(2) . . ?
O2C C1C C2C 117.6(2) . . ?
C3C C2C C1C 121.2(2) . . ?
C2C C3C C4C 120.8(2) . . ?
C12C C4C C5C 117.5(2) . . ?
C12C C4C C3C 118.0(2) . . ?
C5C C4C C3C 124.5(2) . . ?
C6C C5C C4C 122.1(2) . . ?
C5C C6C C10C 118.3(2) . . ?
C5C C6C C7C 121.6(2) . . ?
C10C C6C C7C 120.1(2) . . ?
C6C C7C C8C 110.2(2) . . ?
O4C C8C C7C 111.3(2) . . ?
O4C C8C C9C 110.0(2) . . ?
C7C C8C C9C 110.6(2) . . ?
O3C C9C C14C 104.5(2) . . ?
O3C C9C C13C 108.5(2) . . ?
C14C C9C C13C 109.8(2) . . ?
O3C C9C C8C 110.3(2) . . ?
C14C C9C C8C 111.9(2) . . ?
C13C C9C C8C 111.6(2) . . ?
O3C C10C C11C 116.0(2) . . ?
O3C C10C C6C 123.2(2) . . ?
C11C C10C C6C 120.8(2) . . ?
C12C C11C C10C 119.4(2) . . ?
C11C C12C O2C 117.3(2) . . ?
C11C C12C C4C 121.9(2) . . ?
O2C C12C C4C 120.8(2) . . ?
C1C O2C C12C 121.56(19) . . ?
C10C O3C C9C 119.00(19) . . ?
 
loop_
 _geom_torsion_atom_site_label_1
 _geom_torsion_atom_site_label_2
 _geom_torsion_atom_site_label_3
 _geom_torsion_atom_site_label_4
 _geom_torsion
 _geom_torsion_site_symmetry_1
 _geom_torsion_site_symmetry_2
 _geom_torsion_site_symmetry_3
 _geom_torsion_site_symmetry_4
 _geom_torsion_publ_flag
O1A C1A C2A C3A 177.1(2) . . . . ?
O2A C1A C2A C3A -2.2(3) . . . . ?
C1A C2A C3A C4A -0.3(4) . . . . ?
C2A C3A C4A C12A 1.2(4) . . . . ?
C2A C3A C4A C5A -178.7(2) . . . . ?
C12A C4A C5A C6A 0.2(3) . . . . ?
C3A C4A C5A C6A -179.9(2) . . . . ?
C4A C5A C6A C10A -0.4(4) . . . . ?
C4A C5A C6A C7A 178.0(2) . . . . ?
C5A C6A C7A C8A -156.9(2) . . . . ?
C10A C6A C7A C8A 21.4(3) . . . . ?
C6A C7A C8A O4A 70.3(3) . . . . ?
C6A C7A C8A C9A -50.4(3) . . . . ?
O4A C8A C9A O3A -62.3(3) . . . . ?
C7A C8A C9A O3A 60.0(3) . . . . ?
O4A C8A C9A C14A 53.5(3) . . . . ?
C7A C8A C9A C14A 175.8(2) . . . . ?
O4A C8A C9A C13A 177.6(2) . . . . ?
C7A C8A C9A C13A -60.0(3) . . . . ?
C5A C6A C10A O3A 178.0(2) . . . . ?
C7A C6A C10A O3A -0.4(4) . . . . ?
C5A C6A C10A C11A 0.7(3) . . . . ?
C7A C6A C10A C11A -177.7(2) . . . . ?
O3A C10A C11A C12A -178.3(2) . . . . ?
C6A C10A C11A C12A -0.8(4) . . . . ?
C10A C11A C12A O2A -179.89(19) . . . . ?
C10A C11A C12A C4A 0.6(4) . . . . ?
C5A C4A C12A C11A -0.3(3) . . . . ?
C3A C4A C12A C11A 179.8(2) . . . . ?
C5A C4A C12A O2A -179.8(2) . . . . ?
C3A C4A C12A O2A 0.3(3) . . . . ?
O1A C1A O2A C12A -175.61(19) . . . . ?
C2A C1A O2A C12A 3.7(3) . . . . ?
C11A C12A O2A C1A 177.6(2) . . . . ?
C4A C12A O2A C1A -2.8(3) . . . . ?
C11A C10A O3A C9A -172.5(2) . . . . ?
C6A C10A O3A C9A 10.1(3) . . . . ?
C14A C9A O3A C10A -160.1(2) . . . . ?
C8A C9A O3A C10A -39.6(3) . . . . ?
C13A C9A O3A C10A 82.3(3) . . . . ?
O1B C1B C2B C3B 176.1(2) . . . . ?
O2B C1B C2B C3B -3.6(3) . . . . ?
C1B C2B C3B C4B 0.4(4) . . . . ?
C2B C3B C4B C12B 2.4(4) . . . . ?
C2B C3B C4B C5B -177.5(2) . . . . ?
C12B C4B C5B C6B 0.4(3) . . . . ?
C3B C4B C5B C6B -179.6(2) . . . . ?
C4B C5B C6B C10B 1.1(4) . . . . ?
C4B C5B C6B C7B -179.1(2) . . . . ?
C5B C6B C7B C8B -159.3(2) . . . . ?
C10B C6B C7B C8B 20.5(3) . . . . ?
C6B C7B C8B O4B 79.0(3) . . . . ?
C6B C7B C8B C9B -47.1(3) . . . . ?
O4B C8B C9B O3B -67.7(3) . . . . ?
C7B C8B C9B O3B 58.2(3) . . . . ?
O4B C8B C9B C14B 47.7(3) . . . . ?
C7B C8B C9B C14B 173.6(2) . . . . ?
O4B C8B C9B C13B 172.2(2) . . . . ?
C7B C8B C9B C13B -62.0(3) . . . . ?
C5B C6B C10B O3B 175.7(2) . . . . ?
C7B C6B C10B O3B -4.0(4) . . . . ?
C5B C6B C10B C11B -1.7(3) . . . . ?
C7B C6B C10B C11B 178.6(2) . . . . ?
O3B C10B C11B C12B -176.9(2) . . . . ?
C6B C10B C11B C12B 0.7(3) . . . . ?
C10B C11B C12B O2B -178.59(19) . . . . ?
C10B C11B C12B C4B 1.0(3) . . . . ?
C5B C4B C12B C11B -1.5(3) . . . . ?
C3B C4B C12B C11B 178.5(2) . . . . ?
C5B C4B C12B O2B 178.1(2) . . . . ?
C3B C4B C12B O2B -1.9(3) . . . . ?
O1B C1B O2B C12B -175.6(2) . . . . ?
C2B C1B O2B C12B 4.2(3) . . . . ?
C11B C12B O2B C1B 178.1(2) . . . . ?
C4B C12B O2B C1B -1.5(3) . . . . ?
C11B C10B O3B C9B -166.6(2) . . . . ?
C6B C10B O3B C9B 15.8(3) . . . . ?
C14B C9B O3B C10B -162.9(2) . . . . ?
C13B C9B O3B C10B 79.1(3) . . . . ?
C8B C9B O3B C10B -42.6(3) . . . . ?
O1C C1C C2C C3C 178.0(2) . . . . ?
O2C C1C C2C C3C -2.0(3) . . . . ?
C1C C2C C3C C4C 0.2(4) . . . . ?
C2C C3C C4C C12C 1.3(3) . . . . ?
C2C C3C C4C C5C -180.0(2) . . . . ?
C12C C4C C5C C6C 0.9(3) . . . . ?
C3C C4C C5C C6C -177.8(2) . . . . ?
C4C C5C C6C C10C 0.5(3) . . . . ?
C4C C5C C6C C7C 179.3(2) . . . . ?
C5C C6C C7C C8C -154.0(2) . . . . ?
C10C C6C C7C C8C 24.7(3) . . . . ?
C6C C7C C8C O4C 71.9(3) . . . . ?
C6C C7C C8C C9C -50.8(3) . . . . ?
O4C C8C C9C O3C -65.7(3) . . . . ?
C7C C8C C9C O3C 57.7(3) . . . . ?
O4C C8C C9C C14C 50.2(3) . . . . ?
C7C C8C C9C C14C 173.6(2) . . . . ?
O4C C8C C9C C13C 173.7(2) . . . . ?
C7C C8C C9C C13C -62.9(3) . . . . ?
C5C C6C C10C O3C 174.5(2) . . . . ?
C7C C6C C10C O3C -4.3(4) . . . . ?
C5C C6C C10C C11C -2.0(3) . . . . ?
C7C C6C C10C C11C 179.2(2) . . . . ?
O3C C10C C11C C12C -174.8(2) . . . . ?
C6C C10C C11C C12C 1.9(3) . . . . ?
C10C C11C C12C O2C 178.46(19) . . . . ?
C10C C11C C12C C4C -0.4(4) . . . . ?
C5C C4C C12C C11C -1.0(3) . . . . ?
C3C C4C C12C C11C 177.9(2) . . . . ?
C5C C4C C12C O2C -179.80(19) . . . . ?
C3C C4C C12C O2C -1.0(3) . . . . ?
O1C C1C O2C C12C -177.72(19) . . . . ?
C2C C1C O2C C12C 2.3(3) . . . . ?
C11C C12C O2C C1C -179.7(2) . . . . ?
C4C C12C O2C C1C -0.9(3) . . . . ?
C11C C10C O3C C9C -172.36(19) . . . . ?
C6C C10C O3C C9C 11.0(4) . . . . ?
C14C C9C O3C C10C -158.1(2) . . . . ?
C13C C9C O3C C10C 84.9(3) . . . . ?
C8C C9C O3C C10C -37.6(3) . . . . ?
 
loop_
 _geom_hbond_atom_site_label_D
 _geom_hbond_atom_site_label_H
 _geom_hbond_atom_site_label_A
 _geom_hbond_distance_DH
 _geom_hbond_distance_HA
 _geom_hbond_distance_DA
 _geom_hbond_angle_DHA
 _geom_hbond_site_symmetry_A
O4A H34A O1A  0.82 2.10 2.903(3) 164.6 4_467
O4B H14A O1C  0.82 2.03 2.816(2) 159.6 1_655
O4C H24A O1B  0.82 2.05 2.851(3) 165.9 .
 
_diffrn_measured_fraction_theta_max    0.990
_diffrn_reflns_theta_full              25.00
_diffrn_measured_fraction_theta_full   0.990
_refine_diff_density_max    0.218
_refine_diff_density_min   -0.229
_refine_diff_density_rms    0.041
